# Supplementary material for: PCSK9 Inhibitors in Lipid Management of Patients With Diabetes Mellitus and High Cardiovascular Risk: A Review
Source: PubMed Central journal article supplement — J Am Heart Assoc. 2018 Jun 22;7(13):e008953. doi: 10.1161/JAHA.118.008953 (PMC6064883; doi:10.1161/jaha.118.008953), 2018-06-22
Supplement: JAH3-7-e008953-s001.pdf [file JAH3-7-e008953-s001.pdf]

# SUPPLEMENTAL MATERIAL

**Table S1.** Summary of Major US Guidelines/Consensus Statements for Individuals with DM

| Recommendation source                | Recommendations                                                                                                                                                                                                                                                                                                                                                                                                                                                                                                                                                                                                                                                                                                                                                                                                                                                   |
|--------------------------------------|-------------------------------------------------------------------------------------------------------------------------------------------------------------------------------------------------------------------------------------------------------------------------------------------------------------------------------------------------------------------------------------------------------------------------------------------------------------------------------------------------------------------------------------------------------------------------------------------------------------------------------------------------------------------------------------------------------------------------------------------------------------------------------------------------------------------------------------------------------------------|
| ADA 2017 guidelines <sup>1</sup>     | <p>High-intensity statin therapy in addition to lifestyle therapy is recommended for:</p> <ul style="list-style-type: none"> <li>• Patients of all ages with DM and ASCVD</li> <li>• Patients 40–75 years of age with DM and ASCVD risk factors*</li> </ul> <p>Moderate-intensity statin therapy is recommended in patients ≥40 years of age without cardiovascular risk factors. Moderate- or high-intensity statin therapy is recommended for adults with DM who are &lt;40 or &gt;75 years of age with ASCVD risk factors*</p> <p>The addition of ezetimibe to moderate-intensity statin therapy is recommended in:</p> <ul style="list-style-type: none"> <li>• Patients ≥40 years of age with DM with acute coronary syndrome and LDL-C ≥50 mg/dL (1.3 mmol/L)</li> <li>• Patients with a history of ASCVD who cannot tolerate high-dose statins.</li> </ul> |
| ACC/AHA 2013 guidelines <sup>2</sup> | <p>Primary prevention of ASCVD in individuals with DM is one of the major risk groups identified by the ACC/AHA Expert Panel.</p> <p>Moderate-intensity statins are recommended for the primary prevention of ASCVD in individuals with DM and LDL-C 70–189 mg/dL aged 40–75 years.</p> <p>High-intensity statin therapy is reasonable for adults 40–75 years of age with DM with a ≥7.5% estimated 10-year ASCVD risk,<sup>†</sup> unless contraindicated.</p> <p>In adults with DM, who are &lt;40 or &gt;75 years of age, or with LDL-C &lt;70 mg/dL, the ACC/AHA Expert Panel indicated that it is reasonable to evaluate the potential for ASCVD benefits, and for adverse effects and drug–drug interactions, and to consider patient preferences when deciding to initiate, continue, or intensify statin therapy.</p>                                     |

|                                                 |                                                                                                                                                                                                                                                                                                                                                                                                                                                                                                                                                                                                                                                                                                                                       |
|-------------------------------------------------|---------------------------------------------------------------------------------------------------------------------------------------------------------------------------------------------------------------------------------------------------------------------------------------------------------------------------------------------------------------------------------------------------------------------------------------------------------------------------------------------------------------------------------------------------------------------------------------------------------------------------------------------------------------------------------------------------------------------------------------|
| <p>AACE/ACE consensus statement<sup>3</sup></p> | <p>Treatment targets:</p> <ul style="list-style-type: none"> <li>• LDL-C goal of &lt;55 mg/dL, non-HDL-C goal of &lt;80 mg/dL, and Apo B goal of &lt;70 mg/dL in individuals at extreme ASCVD risk, including those with T2DM and a prior ASCVD event (ie, recognized “clinical ASCVD”) or CKD Stage 3 or 4</li> <li>• LDL-C goal of &lt;70 mg/dL, non-HDL-C goal of &lt;100 mg/dL, and Apo B goal of &lt;80 mg/dL in individuals at very high ASCVD risk, including those with DM plus one or more additional risk factors</li> <li>• LDL-C goal of &lt;100 mg/dL, non-HDL-C goal of &lt;130 mg/dL, and Apo B goal of &lt;90 mg/dL in individuals at high ASCVD risk, including those with DM with no other risk factors.</li> </ul> |
| <p>NLA 2016 annual summary<sup>4</sup></p>      | <p>Co-primary treatment target:</p> <ul style="list-style-type: none"> <li>• LDL-C goal of &lt;70 mg/dL and non-HDL-C goal of &lt;100 mg/dL in individuals at very high ASCVD risk, including those with clinical evidence of ASCVD and/or DM plus ≥2 major ASCVD risk factors or evidence of end-organ damage (eg, retinopathy, microalbuminuria [ACR &gt;30 mg/g], or CKD [eGFR &lt;60 mL/min/1.73 m<sup>2</sup>])</li> <li>• LDL-C goal of &lt;100 mg/dL and non-HDL-C goal of &lt;130 mg/dL in individuals at high ASCVD risk, including patients with ≥3 major ASCVD risk factors; DM with 0 to 1 additional major ASCVD risk factors and no evidence of end-organ damage; CKD Stage 3B or 4; or LDL-C ≥190 mg/dL.</li> </ul>    |

\*ASCVD risk factors included LDL-C ≥100 mg/dL (2.6 mmol/L), high blood pressure, smoking, CKD, albuminuria, and family history of premature ASCVD.

†≥7.5% estimated 10-year ASCVD risk included first occurrence of nonfatal myocardial infarction, coronary heart disease death, and nonfatal and fatal stroke as used by the Risk Assessment Work Group in developing the Pooled Cohort Equations.

AACE, American Association of Clinical Endocrinologists; ACC, American College of Cardiology; ACE, American College of Endocrinology; ACR, albumin-to-creatinine ratio; ADA, American Diabetes Association; AHA, American Heart Association; Apo, apolipoprotein; ASCVD, atherosclerotic cardiovascular disease; CKD, chronic kidney disease; DM, diabetes mellitus; eGFR, estimated glomerular filtration rate; HDL-C, high-density lipoprotein cholesterol; LDL-C, low-density lipoprotein cholesterol; NLA, National Lipid Association; T2, type 2.

**Table S2.** Summary of Phase 3 Alirocumab ODYSSEY and Evolocumab PROFICIO Studies

|                                          | Study acronym, treatment duration, N                                                                | Eligibility criteria                                                                                                                                                                                                                                                                                                      | Treatment arms                                                                       | Background statin                                                                        |
|------------------------------------------|-----------------------------------------------------------------------------------------------------|---------------------------------------------------------------------------------------------------------------------------------------------------------------------------------------------------------------------------------------------------------------------------------------------------------------------------|--------------------------------------------------------------------------------------|------------------------------------------------------------------------------------------|
| <b>ALIROCUMAB Phase 3 ODYSSEY trials</b> |                                                                                                     |                                                                                                                                                                                                                                                                                                                           |                                                                                      |                                                                                          |
| 1                                        | FH I <sup>5</sup><br><ul style="list-style-type: none"> <li>• 78 weeks</li> <li>• N=486</li> </ul>  | Patients with HeFH, and LDL-C $\geq 70$ mg/dL (for patients with documented clinical ASCVD) or LDL-C $\geq 100$ mg/dL (for patients with no documented ASCVD)<br><br>Patients with newly diagnosed DM (within 3 calendar months prior to randomization) or poorly controlled DM (HbA1c $>9\%$ at screening) were excluded | <ul style="list-style-type: none"> <li>• ALI 75/150 mg Q2W</li> <li>• PBO</li> </ul> | Stable maximally tolerated statin* for $\geq 4$ weeks prior to screening $\pm$ other LLT |
| 2                                        | FH II <sup>5</sup><br><ul style="list-style-type: none"> <li>• 78 weeks</li> <li>• N=249</li> </ul> | Patients with HeFH, and LDL-C $\geq 70$ mg/dL (for patients with documented clinical ASCVD) or LDL-C $\geq 100$ mg/dL (for patients with no documented ASCVD)                                                                                                                                                             | <ul style="list-style-type: none"> <li>• ALI 75/150 mg Q2W</li> <li>• PBO</li> </ul> | Stable maximally tolerated statin* for $\geq 4$ weeks prior to screening $\pm$ other LLT |

|   |                                                     |                                                                                                                                                                                                                                                       |                              |                                                                                |
|---|-----------------------------------------------------|-------------------------------------------------------------------------------------------------------------------------------------------------------------------------------------------------------------------------------------------------------|------------------------------|--------------------------------------------------------------------------------|
|   |                                                     | Patients with newly diagnosed DM (within 3 calendar months prior to randomization) or poorly controlled DM (HbA1c >9% at screening) were excluded                                                                                                     |                              |                                                                                |
| 3 | HIGH FH <sup>6</sup><br><br>• 78 weeks<br>• N=107   | Patients with HeFH, and LDL-C ≥160 mg/dL<br><br>Patients with newly diagnosed DM (within 3 calendar months prior to randomization) or poorly controlled DM (HbA1c >9% at screening) were excluded                                                     | • ALI 150 mg Q2W<br>• PBO    | Stable maximally tolerated statin* for ≥4 weeks prior to screening ± other LLT |
| 4 | COMBO I <sup>7,8</sup><br><br>• 52 weeks<br>• N=316 | Patients with hypercholesterolemia (non-FH), and LDL-C ≥70 mg/dL (for patients with documented clinical ASCVD) or LDL-C ≥100 mg/dL (for patients with no documented ASCVD)<br><br>Patients with newly diagnosed DM (within 3 calendar months prior to | • ALI 75/150 mg Q2W<br>• PBO | Stable maximally tolerated statin* for ≥4 weeks prior to screening ± other LLT |

|   |                                                                                                        |                                                                                                                                                                                                                                                                                                                                               |                                                                                      |                                                                                      |
|---|--------------------------------------------------------------------------------------------------------|-----------------------------------------------------------------------------------------------------------------------------------------------------------------------------------------------------------------------------------------------------------------------------------------------------------------------------------------------|--------------------------------------------------------------------------------------|--------------------------------------------------------------------------------------|
|   |                                                                                                        | randomization) or poorly controlled DM (HbA1c >8.5% at screening) were excluded                                                                                                                                                                                                                                                               |                                                                                      |                                                                                      |
| 5 | COMBO II <sup>8,9</sup> <ul style="list-style-type: none"> <li>• 104 weeks</li> <li>• N=720</li> </ul> | <p>Patients with hypercholesterolemia (non-FH), and LDL-C ≥70 mg/dL (for patients with documented clinical ASCVD) or LDL-C ≥100 mg/dL (for patients with no documented ASCVD)</p> <p>Patients with newly diagnosed DM (within 3 calendar months prior to randomization) or poorly controlled DM (HbA1c &gt;9% at screening) were excluded</p> | <ul style="list-style-type: none"> <li>• ALI 75/150 mg Q2W</li> <li>• EZE</li> </ul> | Stable maximally tolerated statin* for ≥4 weeks prior to screening without other LLT |
| 6 | LONG TERM <sup>10</sup> <ul style="list-style-type: none"> <li>• 78 weeks</li> <li>• N=2341</li> </ul> | <p>Patients with HeFH or non-FH, and LDL-C ≥70 mg/dL</p> <p>No specified DM exclusion criteria</p>                                                                                                                                                                                                                                            | <ul style="list-style-type: none"> <li>• ALI 150 mg Q2W</li> <li>• PBO</li> </ul>    | Stable maximally tolerated statin* for ≥4 weeks prior to screening ± other LLT       |
| 7 | OPTIONS <sup>11,12</sup> <ul style="list-style-type: none"> <li>• 24 weeks</li> </ul>                  | Patients with HeFH or non-FH, and LDL-C ≥70 mg/dL (for patients with documented clinical ASCVD) or                                                                                                                                                                                                                                            | <ul style="list-style-type: none"> <li>• ALI 75/150 mg Q2W</li> <li>• EZE</li> </ul> | Atorvastatin 20 or 40 mg ± other LLT (except EZE as it was used as a comparator)     |

|   |                                                                                                                  |                                                                                                                                                                                                                                                                                                                                                                |                                                                                      |                                                                                                        |
|---|------------------------------------------------------------------------------------------------------------------|----------------------------------------------------------------------------------------------------------------------------------------------------------------------------------------------------------------------------------------------------------------------------------------------------------------------------------------------------------------|--------------------------------------------------------------------------------------|--------------------------------------------------------------------------------------------------------|
|   | <ul style="list-style-type: none"> <li>• N=355</li> </ul>                                                        | <p>LDL-C <math>\geq</math>100 mg/dL (for patients with no documented ASCVD)</p> <p>Patients with newly diagnosed DM (within 3 calendar months prior to randomization) or poorly controlled DM (HbA1c &gt;9% at screening) were excluded</p>                                                                                                                    |                                                                                      |                                                                                                        |
| 8 | <p>OPTIONS II<sup>12, 13</sup></p> <ul style="list-style-type: none"> <li>• 24 weeks</li> <li>• N=305</li> </ul> | <p>Patients with HeFH or non-FH, and LDL-C <math>\geq</math>70 mg/dL (for patients with documented clinical ASCVD) or LDL-C <math>\geq</math>100 mg/dL (for patients with no documented ASCVD)</p> <p>Patients with newly diagnosed DM (within 3 calendar months prior to randomization) or poorly controlled DM (HbA1c &gt;9% at screening) were excluded</p> | <ul style="list-style-type: none"> <li>• ALI 75/150 mg Q2W</li> <li>• EZE</li> </ul> | <p>Rosuvastatin 10 or 20 mg <math>\pm</math> other LLT (except EZE as it was used as a comparator)</p> |
| 9 | <p>ALTERNATIVE<sup>14, 15</sup></p> <ul style="list-style-type: none"> <li>• 24 weeks</li> </ul>                 | <p>Statin-intolerant patients with HeFH or non-FH and moderate to very high CV risk,<sup>†</sup> with LDL-C <math>\geq</math>70 mg/dL (for</p>                                                                                                                                                                                                                 | <ul style="list-style-type: none"> <li>• ALI 75/150 mg Q2W</li> <li>• EZE</li> </ul> | <p>No statin, but other LLTs (except EZE) were allowed</p>                                             |



|    |                                                                                                        |                                                                                                                                                                                                                                                                                                                                                                                                                                                                                |                                                                                      |                        |
|----|--------------------------------------------------------------------------------------------------------|--------------------------------------------------------------------------------------------------------------------------------------------------------------------------------------------------------------------------------------------------------------------------------------------------------------------------------------------------------------------------------------------------------------------------------------------------------------------------------|--------------------------------------------------------------------------------------|------------------------|
|    | <ul style="list-style-type: none"> <li>• N=361</li> </ul>                                              | <p>patients with very high risk) or LDL-C <math>\geq 100</math> mg/dL (for patients with moderate or high risk)</p> <p>Patients with newly diagnosed DM (within 3 calendar months prior to randomization) or poorly controlled DM (HbA1c <math>&gt;9\%</math> at screening) were excluded</p>                                                                                                                                                                                  |                                                                                      |                        |
| 10 | <p>MONO<sup>16</sup></p> <ul style="list-style-type: none"> <li>• 24 weeks</li> <li>• N=103</li> </ul> | <p>Subjects with 10-year risk of fatal CV events of <math>\geq 1\%</math> and <math>&lt;5\%</math> based on SCORE, and LDL-C <math>\geq 70</math> and <math>&lt;190</math> mg/dL</p> <p>Patients with history of CHD, HeFH, DM associated with a risk SCORE <math>\geq 5\%</math> or any additional risk factor, or newly diagnosed DM (within 3 calendar months prior to randomization) or poorly controlled DM (HbA1c <math>&gt;8.5\%</math> at screening) were excluded</p> | <ul style="list-style-type: none"> <li>• ALI 75/150 mg Q2W</li> <li>• EZE</li> </ul> | No statin or other LLT |

|    |                                                                                                             |                                                                                                                                                                                                                                                                                                             |                                                                                                                           |                                                                                                             |
|----|-------------------------------------------------------------------------------------------------------------|-------------------------------------------------------------------------------------------------------------------------------------------------------------------------------------------------------------------------------------------------------------------------------------------------------------|---------------------------------------------------------------------------------------------------------------------------|-------------------------------------------------------------------------------------------------------------|
| 11 | <p>CHOICE I<sup>17</sup></p> <ul style="list-style-type: none"> <li>• 48 weeks</li> <li>• N=803</li> </ul>  | <p>Patients with hypercholesterolemia at moderate to very high CV risk</p> <p>Patients with newly diagnosed DM (within 3 months prior to the screening visit) or poorly controlled DM (HbA1c &gt;9% at the screening visit) were excluded</p>                                                               | <ul style="list-style-type: none"> <li>• ALI 300 mg Q4W/150 mg Q2W</li> <li>• ALI 75/150 mg Q2W</li> <li>• PBO</li> </ul> | <p>Maximally tolerated statin or no statin, both ± other LLT</p>                                            |
| 12 | <p>CHOICE II<sup>18</sup></p> <ul style="list-style-type: none"> <li>• 24 weeks</li> <li>• N=233</li> </ul> | <p>Patients with hypercholesterolemia at moderate to very high CV risk, and LDL-C ≥100 and &lt;160 mg/dL for patients on diet therapy alone</p> <p>Patients with newly diagnosed DM (within 3 calendar months prior to randomization) or poorly controlled DM (HbA1c &gt;9% at screening) were excluded</p> | <ul style="list-style-type: none"> <li>• ALI 150 mg Q4W/150 mg Q2W</li> <li>• ALI 75/150 mg Q2W</li> <li>• PBO</li> </ul> | <p>No statin, but receiving fenofibrate or EZE, or diet alone</p>                                           |
| 13 | <p>OUTCOMES<sup>19</sup></p> <ul style="list-style-type: none"> <li>• Median follow-up 2.8 years</li> </ul> | <p>Patients with recent acute coronary syndrome (within 1 year) and inadequate control of atherogenic lipoproteins (defined by at least one</p>                                                                                                                                                             | <ul style="list-style-type: none"> <li>• ALI 75/150 mg Q2W</li> <li>• PBO</li> </ul>                                      | <p>Atorvastatin 40 or 80 mg, rosuvastatin 20 or 40 mg daily, or the maximum tolerated or advisable dose</p> |

|    |                                                                                                                       |                                                                                                                                                                                                                                                 |                                                                                                                                                       |                                                                                 |
|----|-----------------------------------------------------------------------------------------------------------------------|-------------------------------------------------------------------------------------------------------------------------------------------------------------------------------------------------------------------------------------------------|-------------------------------------------------------------------------------------------------------------------------------------------------------|---------------------------------------------------------------------------------|
|    | <ul style="list-style-type: none"> <li>• N=18,924</li> </ul>                                                          | <p>of the following: LDL-C <math>\geq</math>70 mg/dL, non-HDL-C <math>\geq</math> 100 mg/dL, or Apo B <math>\geq</math>80 mg/dL) on specified statin therapy</p> <p>No specified DM exclusion criteria</p>                                      |                                                                                                                                                       | of one of these statins                                                         |
| 14 | <p>DM-INSULIN<sup>20, 21</sup></p> <ul style="list-style-type: none"> <li>• 24 weeks</li> <li>• N=517</li> </ul>      | <p>Patients at high CV risk with T2DM or T1DM and LDL-C <math>\geq</math>70 mg/dL</p>                                                                                                                                                           | <ul style="list-style-type: none"> <li>• ALI 75/150 mg Q2W</li> <li>• PBO</li> </ul>                                                                  | <p>Maximally tolerated statin or no statin, both <math>\pm</math> other LLT</p> |
| 15 | <p>DM-DYSLIPIDEMIA<sup>22, 23</sup></p> <ul style="list-style-type: none"> <li>• 24 weeks</li> <li>• N=413</li> </ul> | <p>Patients with T2DM and mixed dyslipidemia (defined as non-HDL-C <math>\geq</math>100 mg/dL, and triglycerides <math>\geq</math>150 and <math>&lt;</math>500 mg/dL) with documented ASCVD or <math>\geq</math>1 additional CV risk factor</p> | <ul style="list-style-type: none"> <li>• ALI 75/150 mg Q2W</li> <li>• Usual care (EZE, fenofibrate, omega-3 fatty acids or nicotinic acid)</li> </ul> | <p>Maximally tolerated statin or no statin, without other LLT</p>               |

| EVOLOCUMAB Phase 3 PROFICIO trials |                                                                                                             |                                                                                                                                                                                                                                                                                                                                                                                                                                                                                |                                                                                                                                                                                                                                                                                                                                                                                                                                                                                                                                                                                                                         |                                                                                                                               |
|------------------------------------|-------------------------------------------------------------------------------------------------------------|--------------------------------------------------------------------------------------------------------------------------------------------------------------------------------------------------------------------------------------------------------------------------------------------------------------------------------------------------------------------------------------------------------------------------------------------------------------------------------|-------------------------------------------------------------------------------------------------------------------------------------------------------------------------------------------------------------------------------------------------------------------------------------------------------------------------------------------------------------------------------------------------------------------------------------------------------------------------------------------------------------------------------------------------------------------------------------------------------------------------|-------------------------------------------------------------------------------------------------------------------------------|
| 1                                  | <p>DESCARTES<sup>24</sup></p> <ul style="list-style-type: none"> <li>• 52 weeks</li> <li>• N=901</li> </ul> | <p>Patients with LDL-C <math>\geq</math>75 mg/dL (1.9 mmol/L)</p> <p>Excluded:</p> <ul style="list-style-type: none"> <li>• LDL-C <math>\leq</math>99 mg/dL (2.6 mmol/L) with CHD or CHD risk equivalent and not receiving a statin</li> <li>• T1DM or newly diagnosed T2DM (within 6 months of randomization or new screening FPG <math>\geq</math>126 mg/dL [7.0 mmol/L] or HbA1c <math>\geq</math>6.5%), or poorly controlled T2DM (HbA1c <math>&gt;</math>8.5%)</li> </ul> | <p>Background LLT stabilized, then patients were randomized to receive EVO 420 mg Q4W OR PBO SC Q4W; 8 treatment groups:</p> <ul style="list-style-type: none"> <li>• Diet alone + EVO 420 mg Q4W</li> <li>• Diet alone + PBO SC Q4W</li> <li>• Diet + atorvastatin 10 mg QD + EVO 420 mg Q4W</li> <li>• Diet + atorvastatin 10 mg QD + PBO SC Q4W</li> <li>• Diet + atorvastatin 80 mg QD + EVO 420 mg Q4W</li> <li>• Diet + atorvastatin 80 mg QD + PBO SC Q4W</li> <li>• Diet + atorvastatin 80 mg QD + EZE 10 mg QD + EVO 420 mg Q4W</li> <li>• Diet + atorvastatin 80 mg QD + EZE 10 mg QD + PBO SC Q4W</li> </ul> | <p>LLT, ranging from diet alone to atorvastatin 80 mg plus EZE, was optimized to reach NCEP ATP III LDL-C treatment goals</p> |
| 2                                  | <p>MENDEL-2<sup>25</sup></p> <ul style="list-style-type: none"> <li>• 12 weeks</li> <li>• N=614</li> </ul>  | <p>Patients with LDL-C <math>\geq</math>100 and <math>&lt;</math>190 mg/dL (<math>\geq</math>2.6 and <math>&lt;</math>4.9 mmol/L)</p> <p>Patients with DM were excluded</p>                                                                                                                                                                                                                                                                                                    | <p>Six treatment groups:</p> <ul style="list-style-type: none"> <li>• EVO 140 mg Q2W + PBO PO QD</li> <li>• PBO SC Q2W + EZE PO QD</li> <li>• PBO SC Q2W + PBO PO QD</li> <li>• EVO 420 mg QM + PBO PO QD</li> <li>• PBO SC QM + EZE PO QD</li> <li>• PBO SC QM + PBO PO QD</li> </ul>                                                                                                                                                                                                                                                                                                                                  | <p>None</p>                                                                                                                   |

|   |                                                                                                                  |                                                                                                                                                                                                                                                                                                                                   |                                                                                                                                                                                                                                                                                                                                                                                                                                                                                                                                                                                                                                                         |                                                                                                                                             |
|---|------------------------------------------------------------------------------------------------------------------|-----------------------------------------------------------------------------------------------------------------------------------------------------------------------------------------------------------------------------------------------------------------------------------------------------------------------------------|---------------------------------------------------------------------------------------------------------------------------------------------------------------------------------------------------------------------------------------------------------------------------------------------------------------------------------------------------------------------------------------------------------------------------------------------------------------------------------------------------------------------------------------------------------------------------------------------------------------------------------------------------------|---------------------------------------------------------------------------------------------------------------------------------------------|
| 3 | <p>LAPLACE-2<sup>26, 27</sup></p> <ul style="list-style-type: none"> <li>• 12 weeks</li> <li>• N=1896</li> </ul> | <p>Patients with LDL-C <math>\geq</math>150 mg/dL (4.0 mmol/L) on no statin, <math>\geq</math>100 mg/dL (2.6 mmol/L) on nonintensive statin, or <math>\geq</math>80 mg/dL (2.1 mmol/L) on intensive statin</p> <p>Patients with T1DM or newly diagnosed or poorly controlled T2DM (HbA1c <math>&gt;</math>8.5%) were excluded</p> | <p>24 treatment groups:</p> <p>Background atorvastatin 80 mg QD OR atorvastatin 10 mg QD, PLUS one of the following:</p> <ul style="list-style-type: none"> <li>• EVO 140 mg Q2W + PBO PO QD</li> <li>• PBO SC Q2W + EZE PO QD</li> <li>• PBO SC Q2W + PBO PO QD</li> <li>• EVO 420 mg QM + PBO PO QD</li> <li>• PBO SC QM + EZE PO QD</li> <li>• PBO SC QM + PBO PO QD</li> </ul> <p>OR</p> <p>Background rosuvastatin 40 mg QD OR rosuvastatin 5 mg QD OR simvastatin 40 mg QD, PLUS one of the following:</p> <ul style="list-style-type: none"> <li>• EVO 140 mg Q2W</li> <li>• PBO SC Q2W</li> <li>• EVO 420 mg QM</li> <li>• PBO SC QM</li> </ul> | <p>Five background statin regimens: atorvastatin 80 mg, atorvastatin 10 mg, rosuvastatin 40 mg, rosuvastatin 5 mg, or simvastatin 40 mg</p> |
| 4 | <p>GAUSS-2<sup>28, 29</sup></p>                                                                                  | <p>Statin-intolerant patients not at LDL-C goal per NCEP ATP III risk</p>                                                                                                                                                                                                                                                         | <p>Four treatment groups:</p> <ul style="list-style-type: none"> <li>• EVO 140 mg Q2W + PBO PO QD</li> </ul>                                                                                                                                                                                                                                                                                                                                                                                                                                                                                                                                            | <p>None, or on a low-dose statin defined as a</p>                                                                                           |

|   |                                                                                                                                                                                         |                                                                                                                                                                                                                                                                                                                                                                                                          |                                                                                                                                                                                                                                                                        |                                                                                                                                                                                                                |
|---|-----------------------------------------------------------------------------------------------------------------------------------------------------------------------------------------|----------------------------------------------------------------------------------------------------------------------------------------------------------------------------------------------------------------------------------------------------------------------------------------------------------------------------------------------------------------------------------------------------------|------------------------------------------------------------------------------------------------------------------------------------------------------------------------------------------------------------------------------------------------------------------------|----------------------------------------------------------------------------------------------------------------------------------------------------------------------------------------------------------------|
|   | <ul style="list-style-type: none"> <li>• 12 weeks</li> <li>• N=307</li> </ul>                                                                                                           | <p>categories for fasting LDL-C</p> <p>Patients with T1DM or newly diagnosed T2DM (within 6 months of randomization or new screening FPG <math>\geq 126</math> mg/dL [7.0 mmol/L] or HbA1c <math>\geq 6.5\%</math>), or poorly controlled T2DM (HbA1c <math>&gt; 8.5\%</math>) were excluded</p>                                                                                                         | <ul style="list-style-type: none"> <li>• EVO 420 mg QM + PBO PO QD</li> <li>• PBO SC Q2W + EZE PO QD</li> <li>• PBO SC QM + EZE PO QD</li> </ul>                                                                                                                       | <p>maximum weekly dose of <math>\leq 70</math> mg atorvastatin, <math>\leq 140</math> mg simvastatin/pravastatin/lovastatin, <math>\leq 35</math> mg rosuvastatin, or <math>\leq 280</math> mg fluvastatin</p> |
| 5 | <p>GAUSS-3<sup>30</sup></p> <ul style="list-style-type: none"> <li>• 24 weeks (Phase A) + 2 weeks (washout) + 24 weeks (Phase B)</li> <li>• N=491 (Phase A), N=218 (Phase B)</li> </ul> | <p>Statin-intolerant patients with muscle-related adverse effects, not at LDL-C goal per NCEP ATP III risk categories for fasting LDL-C</p> <p>Patients with T1DM or newly diagnosed T2DM (within 6 months of randomization or new screening FPG <math>\geq 126</math> mg/dL [7.0 mmol/L] or HbA1c <math>\geq 6.5\%</math>), or poorly controlled T2DM (HbA1c <math>&gt; 8.5\%</math>) were excluded</p> | <p>Phase A (24 weeks): atorvastatin 20 mg QD or PBO to identify patients having muscle-related symptoms only with atorvastatin but not PBO. These patients entered Phase B (24 weeks after a 2-week washout), and were randomized to EVO 420 mg QM or EZE 10 mg QD</p> | <p>Atorvastatin 20 mg QD</p>                                                                                                                                                                                   |
| 6 | <p>RUTHERFORD-2<sup>31</sup></p> <ul style="list-style-type: none"> <li>• 12 weeks</li> </ul>                                                                                           | <p>Patients with HeFH and LDL-C <math>\geq 100</math> mg/dL (2.6 mmol/L)</p>                                                                                                                                                                                                                                                                                                                             | <p>Four treatment groups:</p> <ul style="list-style-type: none"> <li>• EVO 140 mg Q2W</li> <li>• PBO Q2W</li> </ul>                                                                                                                                                    | <p>On stable background statin with or without other approved LLT for <math>\geq 4</math> weeks</p>                                                                                                            |

|   |                                                                                                              |                                                                                                                                                                                                      |                                                                                     |                                                                                   |
|---|--------------------------------------------------------------------------------------------------------------|------------------------------------------------------------------------------------------------------------------------------------------------------------------------------------------------------|-------------------------------------------------------------------------------------|-----------------------------------------------------------------------------------|
|   | <ul style="list-style-type: none"> <li>• N=329</li> </ul>                                                    | <p>Patients with T1DM or newly diagnosed or poorly controlled T2DM (HbA1c &gt;8.5%) were excluded</p>                                                                                                | <ul style="list-style-type: none"> <li>• EVO 420 mg QM</li> <li>• PBO QM</li> </ul> |                                                                                   |
| 7 | <p>THOMAS-1<sup>32</sup></p> <ul style="list-style-type: none"> <li>• 6 weeks</li> <li>• N=149</li> </ul>    | <p>Patients with LDL-C ≥85 mg/dL (2.2 mmol/L)</p> <p>Patients with T1DM, or uncontrolled or recently diagnosed T2DM, were excluded</p>                                                               | <p>EVO 140 mg SC Q2W with autoinjector versus prefilled syringe</p>                 | <p>On stable statin (with or without EZE) for ≥4 weeks before LDL-C screening</p> |
| 8 | <p>THOMAS-2<sup>32</sup></p> <ul style="list-style-type: none"> <li>• 12 weeks</li> <li>• N=164</li> </ul>   | <p>Patients with LDL-C ≥85 mg/dL (2.2 mmol/L)</p> <p>Patients with T1DM, or uncontrolled or recently diagnosed T2DM, were excluded</p>                                                               | <p>EVO 420 mg SC QM with autoinjector versus automated minidoser</p>                | <p>On stable statin (with or without EZE) for ≥4 weeks before LDL-C screening</p> |
| 9 | <p>GLAGOV<sup>33, 34</sup></p> <ul style="list-style-type: none"> <li>• 76 weeks</li> <li>• N=968</li> </ul> | <p>Patients with angiographic coronary disease, and LDL-C ≥80 mg/dL or 60–80 mg/dL with 1 major or 3 minor CV risk factors</p> <p>Patients with T1DM or poorly controlled T2DM (HbA1c &gt;9%) at</p> | <ul style="list-style-type: none"> <li>• EVO 420 mg QM</li> <li>• PBO QM</li> </ul> | <p>On stable statin for ≥4 weeks before LDL-C screening</p>                       |

|    |                                                                                                                             |                                                                                                                                                                                                   |                                                                                                                                                            |                                                                                                                                                                     |
|----|-----------------------------------------------------------------------------------------------------------------------------|---------------------------------------------------------------------------------------------------------------------------------------------------------------------------------------------------|------------------------------------------------------------------------------------------------------------------------------------------------------------|---------------------------------------------------------------------------------------------------------------------------------------------------------------------|
|    |                                                                                                                             | screening were excluded                                                                                                                                                                           |                                                                                                                                                            |                                                                                                                                                                     |
| 10 | FOURIER <sup>35</sup><br><ul style="list-style-type: none"> <li>• Median follow-up 2.2 years</li> <li>• N=27,564</li> </ul> | Patients with ASCVD and LDL-C ≥70 mg/dL<br><br>No specified DM exclusion criteria                                                                                                                 | Four treatment groups:<br><ul style="list-style-type: none"> <li>• EVO 140 mg Q2W</li> <li>• PBO Q2W</li> <li>• EVO 420 mg QM</li> <li>• PBO QM</li> </ul> | Optimized regimen of LLT, defined as preferably a high-intensity statin but must have been at least atorvastatin 20 mg daily or its equivalent, with or without EZE |
| 11 | NCT02739984<br><ul style="list-style-type: none"> <li>• 12 weeks</li> <li>• N=424</li> </ul>                                | Patients with T2DM on stable DM therapy, LDL-C or non-HDL-C levels and fasting triglycerides ≤600 mg/dL, with HbA1c <10%                                                                          | <ul style="list-style-type: none"> <li>• EVO 420 mg QM</li> <li>• PBO QM</li> </ul>                                                                        | Maximally tolerated dose of statin of at least moderate intensity                                                                                                   |
| 12 | NCT02662569<br><ul style="list-style-type: none"> <li>• 12 weeks</li> <li>• N=986</li> </ul>                                | Patients with T2DM on stable DM therapy, and fasting LDL-C ≥100 mg/dL for those on statin or ≥130 mg/dL for those not on statin<br><br>Patients with T1DM or poorly controlled T2DM were excluded | Four treatment groups:<br><ul style="list-style-type: none"> <li>• EVO 140 mg Q2W</li> <li>• PBO Q2W</li> <li>• EVO 420 mg QM</li> <li>• PBO QM</li> </ul> | Atorvastatin 20 mg PO QD                                                                                                                                            |

Clinicaltrials.gov identifiers: FH I, NCT01623115; FH II, NCT01709500; HIGH FH, NCT01617655; COMBO I, NCT01644175; COMBO II,



NCT01644188; LONG TERM, NCT01507831; OPTIONS I, NCT01730040; OPTIONS II, NCT01730053; ALTERNATIVE, NCT01709513; MONO, NCT01644474; CHOICE I, NCT01926782; CHOICE II, NCT02023879; OUTCOMES, NCT01663402; DM-INSULIN, NCT02585778; DM-DYSLIPIDEMIA, NCT02642159; DESCARTES, NCT01516879; MENDEL-2, NCT01763827; LAPLACE-2, NCT01763866; GAUSS-2, NCT01763905; GAUSS-3, NCT01984424; RUTHERFORD-2, NCT01763918; THOMAS-1, NCT01849497; THOMAS-2, NCT01879319; GLAGOV, NCT01813422; FOURIER, NCT01764633.

\*Maximally tolerated statin dose = the highest tolerable registered dose of daily statin currently administered to the patient, i.e. rosuvastatin 20 or 40 mg, atorvastatin 40 or 80 mg, or simvastatin 80 mg. Lower doses could be used, e.g. in the case of intolerance or local practice, according to the investigator's judgment.

†Moderate risk = 10-year risk of fatal CV events of  $\geq 1\%$  and  $< 5\%$  (SCORE). High risk = SCORE  $\geq 5\%$ , eGFR 30 to  $< 60$  mL/min/1.73 m<sup>2</sup>, T1DM or T2DM without target organ damage or HeFH. Very high risk = CHD, ischemic stroke, peripheral artery disease, transient ischemic attack, abdominal aortic aneurysm, or carotid artery occlusion  $> 50\%$  without symptoms; carotid endarterectomy or carotid artery stent procedure; renal artery stenosis or renal artery stent procedure; or T1DM or T2DM with target organ damage.

NCEP ATP III risk category LDL-C goals:<sup>36</sup>  $< 100$  mg/dL (2.6 mmol/L) for those with diagnosed CHD or risk equivalent,  $< 130$  mg/dL (3.4 mmol/L) for those without CHD or risk equivalent and  $\geq 2$  risk factors,  $< 160$  mg/dL (4.1 mmol/L) for those without CHD or risk equivalent and 1 risk factor, or  $< 190$  mg/dL (4.9 mmol/L) for those without CHD or risk equivalent and no risk factors.

ALI, alirocumab; ASCVD, atherosclerotic cardiovascular disease; CHD, coronary heart disease; CV, cardiovascular; DM, diabetes mellitus; eGFR, estimated glomerular filtration rate; EVO, evolocumab; EZE, ezetimibe; FH, familial hypercholesterolemia; FPG, fasting plasma glucose; HbA1c, glycated hemoglobin; HeFH, heterozygous familial hypercholesterolemia; HoFH, homozygous familial hypercholesterolemia; LDL-C, low-density lipoprotein cholesterol; LLT, lipid-lowering therapy; NCEP ATP III, National Cholesterol Education Program Expert Panel on Detection, Evaluation, and Treatment of High Blood Cholesterol in Adults; PBO, placebo; PO, oral; Q2W, every two weeks; Q4W, every 4 weeks; QD, once daily; QM, monthly; SC, subcutaneous; SCORE, European Systematic Coronary Risk Evaluation; T1DM, type 1 diabetes mellitus; T2DM, type 2 diabetes mellitus.

## References

1. American Diabetes Association. Standards of Medical Care in Diabetes - 2017. *Diabetes Care*. 2017;40(Suppl 1):S1-S135.
2. Stone NJ, Robinson JG, Lichtenstein AH, Bairey Merz CN, Blum CB, Eckel RH, Goldberg AC, Gordon D, Levy D, Lloyd-Jones DM, McBride P, Schwartz JS, Shero ST, Smith SC, Jr., Watson K, Wilson PW, American College of Cardiology/American Heart Association Task Force on Practice Guidelines. 2013 ACC/AHA guideline on the treatment of blood cholesterol to reduce atherosclerotic cardiovascular risk in adults: a report of the American College of Cardiology/American Heart Association Task Force on Practice Guidelines. *J Am Coll Cardiol*. 2014;63:2889-2934.
3. Garber AJ, Abrahamson MJ, Barzilay JI, Blonde L, Bloomgarden ZT, Bush MA, Dagogo-Jack S, DeFronzo RA, Einhorn D, Fonseca VA, Garber JR, Garvey WT, Grunberger G, Handelsman Y, Hirsch IB, Jellinger PS, McGill JB, Mechanick JI, Rosenblit PD, Umpierrez GE. Consensus Statement by the American Association of Clinical Endocrinologists and American College of Endocrinology on the Comprehensive Type 2 Diabetes Management Algorithm - 2017 Executive Summary. *Endocr Pract*. 2017;23:207-238.
4. Bays HE, Jones PH, Orringer CE, Brown WV, Jacobson TA. National Lipid Association Annual Summary of Clinical Lipidology 2016. *J Clin Lipidol*. 2016;10:S1-43.
5. Kastelein JJ, Ginsberg HN, Langslet G, Hovingh GK, Ceska R, Dufour R, Blom D, Civeira F, Krempf M, Lorenzato C, Zhao J, Pordy R, Baccara-Dinet MT, Gipe DA, Geiger MJ, Farnier M. ODYSSEY FH I and FH II: 78 week results with alirocumab treatment in 735 patients with heterozygous familial hypercholesterolaemia. *Eur Heart J*. 2015;36:2996-3003.
6. Ginsberg HN, Rader DJ, Raal FJ, Guyton JR, Baccara-Dinet MT, Lorenzato C, Pordy R, Stroes E. Efficacy and Safety of Alirocumab in Patients with

Heterozygous Familial Hypercholesterolemia and LDL-C of 160 mg/dl or Higher. *Cardiovasc Drugs Ther.* 2016;30:473-483.

7. Kereiakes DJ, Robinson JG, Cannon CP, Lorenzato C, Pordy R, Chaudhari U, Colhoun HM. Efficacy and safety of the proprotein convertase subtilisin/kexin type 9 inhibitor alirocumab among high cardiovascular risk patients on maximally tolerated statin therapy: The ODYSSEY COMBO I study. *Am Heart J.* 2015;169:906-915.
8. Colhoun HM, Robinson JG, Farnier M, Cariou B, Blom D, Kereiakes DJ, Lorenzato C, Pordy R, Chaudhari U. Efficacy and safety of alirocumab, a fully human PCSK9 monoclonal antibody, in high cardiovascular risk patients with poorly controlled hypercholesterolemia on maximally tolerated doses of statins: rationale and design of the ODYSSEY COMBO I and II trials. *BMC Cardiovasc Disord.* 2014;14:121.
9. Cannon CP, Cariou B, Blom D, McKenney JM, Lorenzato C, Pordy R, Chaudhari U, Colhoun HM, ODYSSEY COMBO II Investigators. Efficacy and safety of alirocumab in high cardiovascular risk patients with inadequately controlled hypercholesterolaemia on maximally tolerated doses of statins: the ODYSSEY COMBO II randomized controlled trial. *Eur Heart J.* 2015;36:1186-1194.
10. Robinson JG, Farnier M, Krempf M, Bergeron J, Luc G, Aversa M, Stroes ES, Langslet G, Raal FJ, El Shahawy M, Koren MJ, Lepor NE, Lorenzato C, Pordy R, Chaudhari U, Kastelein JJ, ODYSSEY LONG TERM Investigators. Efficacy and safety of alirocumab in reducing lipids and cardiovascular events. *N Engl J Med.* 2015;372:1489-1499.
11. Bays H, Gaudet D, Weiss R, Ruiz JL, Watts GF, Gouni-Berthold I, Robinson J, Zhao J, Hanotin C, Donahue S. Alirocumab as Add-On to Atorvastatin Versus Other Lipid Treatment Strategies: ODYSSEY OPTIONS I Randomized Trial. *J Clin Endocrinol Metab.* 2015;100:3140-3148.

12. Robinson JG, Colhoun HM, Bays HE, Jones PH, Du Y, Hanotin C, Donahue S. Efficacy and safety of alirocumab as add-on therapy in high-cardiovascular-risk patients with hypercholesterolemia not adequately controlled with atorvastatin (20 or 40 mg) or rosuvastatin (10 or 20 mg): design and rationale of the ODYSSEY OPTIONS Studies. *Clin Cardiol.* 2014;37:597-604.
13. Farnier M, Jones P, Severance R, Averna M, Steinhagen-Thiessen E, Colhoun HM, Du Y, Hanotin C, Donahue S. Efficacy and safety of adding alirocumab to rosuvastatin versus adding ezetimibe or doubling the rosuvastatin dose in high cardiovascular-risk patients: The ODYSSEY OPTIONS II randomized trial. *Atherosclerosis.* 2016;244:138-146.
14. Moriarty PM, Thompson PD, Cannon CP, Guyton JR, Bergeron J, Zieve FJ, Bruckert E, Jacobson TA, Kopecky SL, Baccara-Dinet MT, Du Y, Pordy R, Gipe DA, ODYSSEY ALTERNATIVE Investigators. Efficacy and safety of alirocumab vs ezetimibe in statin-intolerant patients, with a statin rechallenge arm: The ODYSSEY ALTERNATIVE randomized trial. *J Clin Lipidol.* 2015;9:758-769.
15. Moriarty PM, Jacobson TA, Bruckert E, Thompson PD, Guyton JR, Baccara-Dinet MT, Gipe D. Efficacy and safety of alirocumab, a monoclonal antibody to PCSK9, in statin-intolerant patients: design and rationale of ODYSSEY ALTERNATIVE, a randomized phase 3 trial. *J Clin Lipidol.* 2014;8:554-561.
16. Roth EM, Taskinen MR, Ginsberg HN, Kastelein JJ, Colhoun HM, Robinson JG, Merlet L, Pordy R, Baccara-Dinet MT. Monotherapy with the PCSK9 inhibitor alirocumab versus ezetimibe in patients with hypercholesterolemia: results of a 24 week, double-blind, randomized Phase 3 trial. *Int J Cardiol.* 2014;176:55-61.
17. Roth EM, Moriarty PM, Bergeron J, Langslet G, Manvelian G, Zhao J, Baccara-Dinet MT, Rader DJ, ODYSSEY CHOICE I Investigators. A phase III randomized trial evaluating alirocumab 300 mg every 4 weeks as

monotherapy or add-on to statin: ODYSSEY CHOICE I. *Atherosclerosis*. 2016;254:254-262.

18. Stroes E, Guyton JR, Lepor N, Civeira F, Gaudet D, Watts GF, Baccara-Dinet MT, Lecorps G, Manvelian G, Farnier M, ODYSSEY CHOICE II Investigators. Efficacy and Safety of Alirocumab 150 mg Every 4 Weeks in Patients With Hypercholesterolemia Not on Statin Therapy: The ODYSSEY CHOICE II Study. *J Am Heart Assoc*. 2016;5:e003421.
19. Steg PG. The ODYSSEY OUTCOMES Trial: Topline Results Alirocumab in Patients After Acute Coronary Syndrome. *American College of Cardiology 2018, 67th Scientific Sessions*. 2018
20. Leiter LA, Cariou B, Muller-Wieland D, Colhoun HM, Del Prato S, Tinahones FJ, Ray KK, Bujas-Bobanovic M, Domenger C, Mandel J, Samuel R, Henry RR. Efficacy and safety of alirocumab in insulin-treated individuals with type 1 or type 2 diabetes and high cardiovascular risk: The ODYSSEY DM-INSULIN randomized trial. *Diabetes Obes Metab*. 2017;19:1781-1792.
21. Cariou B, Leiter LA, Muller-Wieland D, Bigot G, Colhoun HM, Del Prato S, Henry RR, Tinahones FJ, Letierce A, Aurand L, Maroni J, Ray KK, Bujas-Bobanovic M. Efficacy and safety of alirocumab in insulin-treated patients with type 1 or type 2 diabetes and high cardiovascular risk: Rationale and design of the ODYSSEY DM-INSULIN trial. *Diabetes Metab*. 2017;43:453-459.
22. Ray KK, Leiter LA, Müller-Wieland D, Cariou B, Colhoun HM, Henry RR, Tinahones FJ, Bujas-Bobanovic M, Domenger C, Letierce A, Samuel R, Del Prato S. Alirocumab versus usual lipid-lowering care as add-on to statin therapy in individuals with type 2 diabetes and mixed dyslipidaemia: The ODYSSEY DM-DYSLIPIDEMIA randomized trial. 2017
23. Muller-Wieland D, Leiter LA, Cariou B, Letierce A, Colhoun HM, Del Prato S, Henry RR, Tinahones FJ, Aurand L, Maroni J, Ray KK, Bujas-Bobanovic M. Design and rationale of the ODYSSEY DM-DYSLIPIDEMIA trial: lipid-lowering

efficacy and safety of alirocumab in individuals with type 2 diabetes and mixed dyslipidaemia at high cardiovascular risk. *Cardiovasc Diabetol.* 2017;16:70.

24. Blom DJ, Hala T, Bolognese M, Lillestol MJ, Toth PD, Burgess L, Ceska R, Roth E, Koren MJ, Ballantyne CM, Monsalvo ML, Tsirtsonis K, Kim JB, Scott R, Wasserman SM, Stein EA, Descartes Investigators. A 52-week placebo-controlled trial of evolocumab in hyperlipidemia. *N Engl J Med.* 2014;370:1809-1819.
25. Koren MJ, Lundqvist P, Bolognese M, Neutel JM, Monsalvo ML, Yang J, Kim JB, Scott R, Wasserman SM, Bays H, Mendel Investigators. Anti-PCSK9 monotherapy for hypercholesterolemia: the MENDEL-2 randomized, controlled phase III clinical trial of evolocumab. *J Am Coll Cardiol.* 2014;63:2531-2540.
26. Robinson JG, Nedergaard BS, Rogers WJ, Fialkow J, Neutel JM, Ramstad D, Somaratne R, Legg JC, Nelson P, Scott R, Wasserman SM, Weiss R, LAPLACE-2 Investigators. Effect of evolocumab or ezetimibe added to moderate- or high-intensity statin therapy on LDL-C lowering in patients with hypercholesterolemia: the LAPLACE-2 randomized clinical trial. *JAMA.* 2014;311:1870-1882.
27. Robinson JG, Rogers WJ, Nedergaard BS, Fialkow J, Neutel JM, Ramstad D, Somaratne R, Legg JC, Nelson P, Scott R, Wasserman SM, Weiss R. Rationale and design of LAPLACE-2: a phase 3, randomized, double-blind, placebo- and ezetimibe-controlled trial evaluating the efficacy and safety of evolocumab in subjects with hypercholesterolemia on background statin therapy. *Clin Cardiol.* 2014;37:195-203.
28. Stroes E, Colquhoun D, Sullivan D, Civeira F, Rosenson RS, Watts GF, Bruckert E, Cho L, Dent R, Knusel B, Xue A, Scott R, Wasserman SM, Rocco M, Gauss Investigators. Anti-PCSK9 antibody effectively lowers cholesterol in

- patients with statin intolerance: the GAUSS-2 randomized, placebo-controlled phase 3 clinical trial of evolocumab. *J Am Coll Cardiol*. 2014;63:2541-2548.
29. Cho L, Rocco M, Colquhoun D, Sullivan D, Rosenson RS, Dent R, Xue A, Scott R, Wasserman SM, Stroes E. Design and rationale of the GAUSS-2 study trial: a double-blind, ezetimibe-controlled phase 3 study of the efficacy and tolerability of evolocumab (AMG 145) in subjects with hypercholesterolemia who are intolerant of statin therapy. *Clin Cardiol*. 2014;37:131-139.
  30. Nissen SE, Stroes E, Dent-Acosta RE, Rosenson RS, Lehman SJ, Sattar N, Preiss D, Bruckert E, Ceska R, Lepor N, Ballantyne CM, Gouni-Berthold I, Elliott M, Brennan DM, Wasserman SM, Somaratne R, Scott R, Stein EA, Gauss Investigators. Efficacy and Tolerability of Evolocumab vs Ezetimibe in Patients With Muscle-Related Statin Intolerance: The GAUSS-3 Randomized Clinical Trial. *JAMA*. 2016;315:1580-1590.
  31. Raal FJ, Stein EA, Dufour R, Turner T, Civeira F, Burgess L, Langslet G, Scott R, Olsson AG, Sullivan D, Hovingh GK, Cariou B, Gouni-Berthold I, Somaratne R, Bridges I, Scott R, Wasserman SM, Gaudet D, Rutherford Investigators. PCSK9 inhibition with evolocumab (AMG 145) in heterozygous familial hypercholesterolaemia (RUTHERFORD-2): a randomised, double-blind, placebo-controlled trial. *Lancet*. 2015;385:331-340.
  32. Dent R, Joshi R, Stephen Djedjos C, Legg J, Elliott M, Geller M, Meyer D, Somaratne R, Recknor C, Weiss R. Evolocumab lowers LDL-C safely and effectively when self-administered in the at-home setting. *Springerplus*. 2016;5:300.
  33. Nicholls SJ, Puri R, Anderson T, Ballantyne CM, Cho L, Kastelein JJ, Koenig W, Somaratne R, Kassahun H, Yang J, Wasserman SM, Scott R, Ungi I, Podolec J, Ophuis AO, Cornel JH, Borgman M, Brennan DM, Nissen SE. Effect of Evolocumab on Progression of Coronary Disease in Statin-Treated



Patients: The GLAGOV Randomized Clinical Trial. *JAMA*. 2016;316:2373-2384.

34. Puri R, Nissen SE, Somaratne R, Cho L, Kastelein JJ, Ballantyne CM, Koenig W, Anderson TJ, Yang J, Kassahun H, Wasserman SM, Scott R, Borgman M, Nicholls SJ. Impact of PCSK9 inhibition on coronary atheroma progression: Rationale and design of Global Assessment of Plaque Regression with a PCSK9 Antibody as Measured by Intravascular Ultrasound (GLAGOV). *Am Heart J*. 2016;176:83-92.
35. Sabatine MS, Giugliano RP, Keech AC, Honarpour N, Wiviott SD, Murphy SA, Kuder JF, Wang H, Liu T, Wasserman SM, Sever PS, Pedersen TR, Fourier Steering Committee Investigators. Evolocumab and Clinical Outcomes in Patients with Cardiovascular Disease. *N Engl J Med*. 2017;376:1713-1722.
36. National Cholesterol Education Program Expert Panel on Detection Evaluation and Treatment of High Blood Cholesterol in Adults. Third Report of the National Cholesterol Education Program (NCEP) Expert Panel on Detection, Evaluation, and Treatment of High Blood Cholesterol in Adults (Adult Treatment Panel III) final report. *Circulation*. 2002;106:3143-3421.
